# Supplementary material for: Bi2Te3 nanosheets promoted Pd for ethylene glycol electrooxidation both in the dark and under visible light irradiation
Source: Royal Society of Chemistry journal article supplement (doi:10.1039/d4cc01018c), 2024-01-01
Supplement: d4cc01018c1.pdf [file d4cc01018c1.pdf]

## Supporting Information

*Bi<sub>2</sub>Te<sub>3</sub> nanosheets promoted Pd for ethylene glycol electrooxidation in both dark and visible light irradiation*

*Fangfang Ren<sup>a</sup>, Zhenghao Fei<sup>a</sup>, Yun Yang<sup>\*b</sup>, Shuli Wang<sup>c</sup>, Ligang Feng<sup>\*c</sup>*

*a. College of Chemical and Environmental Engineering, Yancheng Teachers University, Yancheng, 224007, PR China.*

*b. Nanomaterials and Chemistry Key Laboratory, Wenzhou University, Wenzhou, China. E-mail: bachier@163.com*

*c. School of Chemistry and Chemical Engineering, Yangzhou University, Yangzhou, 225002, PR China. E-mail: ligang.feng@yzu.edu.cn, fenglg11@gmail.com*

## Experimental section

### *Chemicals*

Palladium chloride (PdCl<sub>2</sub>, AR), ethanol (CH<sub>3</sub>CH<sub>2</sub>OH, AR, ≥99.7%), ethylene glycol (EG, AR, ≥99.5%), sodium hydroxide (NaOH, AR, ≥96.0%) and potassium hydroxide (KOH, AR, ≥85.0%) were purchased from Sinopharm Chemical Reagent Co., Ltd. Polyvinyl pyrrolidone (PVP, K30, GR), bismuth (III) oxide (Bi<sub>2</sub>O<sub>3</sub>, 99.9%), tellurium dioxide (TeO<sub>2</sub>, 99.99%) and commercial Pd/C (10 wt%, contains 40-60% H<sub>2</sub>O) catalyst were purchased from Aladdin. Nafion (5 wt%, contains 45 ± 3% H<sub>2</sub>O) was purchased from Shanghai Hesen Electric Co., Ltd. All solutions were prepared using ultrapure water and the chemicals were purchased and used without further purification.

### *Synthesis of Bi<sub>2</sub>Te<sub>3</sub>*

In a typical synthesis, 0.4 g of PVP was added into a flask containing 18 mL of EG. Then, the mixture was sonicated for about 15 min to obtain a uniform suspension. After that, 0.2298 g of Bi<sub>2</sub>O<sub>3</sub> and 0.2394 g of TeO<sub>2</sub> were added in and thoroughly stirred. Subsequently, 0.32 g of NaOH completely dissolved in 2 mL of ultrapure water was added dropwise into the above solution with continuous stirring. After stirring for 30 min at room temperature, the mixture was transferred into the Teflon-lined stainless steel with a volume capacity of 30 mL, sealed and reacted at 200 °C for 4 h. The product was collected through centrifugation, washed with ultrapure water and ethanol three times and dried in a vacuum oven at 60 °C.

### *Synthesis of Pd/Bi<sub>2</sub>Te<sub>3</sub>*

The Pd catalyst anchored over Bi<sub>2</sub>Te<sub>3</sub> was synthesized by a solvothermal method. Typically, 20 mg of Bi<sub>2</sub>Te<sub>3</sub> obtained above was ultrasonically dispersed in a mixture containing 40 mL of ethanol and 40 mL of ultrapure water to form a uniform suspension. Under stirring, 2 mL of H<sub>2</sub>PdCl<sub>4</sub> solution (22.6 × 10<sup>-3</sup> M) was added to the suspension. Then, the pH of the suspension was adjusted to about 9 ~ 10 by NaOH solution (5 M). Subsequently, the resultant mixture was transferred into the Teflon-

lined stainless steel with a volume capacity of 100 mL, sealed and reacted at 140 °C for 4 h. After naturally cooled to room temperature, the mixture was filtered and washed several times with ethanol and water, respectively. At last, the resulting solid was transferred into a vacuum oven and dried overnight at 60°C to obtain the Pd/Bi<sub>2</sub>Te<sub>3</sub>-20% catalyst with 20 wt% Pd. While for Pd/Bi<sub>2</sub>Te<sub>3</sub>-25% and Pd/Bi<sub>2</sub>Te<sub>3</sub>-30% catalysts, the synthesis process was not changed just by using 2.78 and 3.58 mL of H<sub>2</sub>PdCl<sub>4</sub> solution, respectively.

### *Physical characterizations*

Power X-ray diffraction (XRD) was measured on a Rigaku Ultimate IV X-ray diffractometer operating at 40 mA and 40 kV. Scanning electron microscopy (SEM) image was acquired using a FEI Nova NanoSEM 450. Transmission electron microscopy (TEM), high-resolution transmission electron microscopy (HRTEM) and element mapping analysis were conducted on a JEM-2100F electron microscope. X-ray photoelectron spectroscopy (XPS) measurements were carried out on an ESCALAB250Xi spectrometer with an Al K $\alpha$  radiation source.

### *Photoelectrochemical measurements*

All photoelectrochemical measurements were performed in a conventional three-electrode system by a CHI 660E electrochemical workstation. An L-glassy carbon electrode (L-GCE) with a diameter of 3.0 mm coated by catalyst was employed as the working electrode, an Hg/HgO (1 M KOH) electrode was used as the reference electrode and a platinum foil electrode was used as the counter electrode, respectively. The working electrode was prepared by dispersing 5 mg of catalyst powders into the mixture containing 950  $\mu$ L of ethanol and 50  $\mu$ L of Nafion solution (5 wt%) with ultrasonic treatment to form a homogeneous catalyst ink. Afterward, 2  $\mu$ L of the catalyst ink was dripped onto the L-GCE as the working electrode and then dried in air before electrochemical measurements. All of the potentials were in regard to the Hg/HgO. The electrolyte was saturated by N<sub>2</sub> for 15 min before measurements.

Cyclic voltammetry (CV) was carried out in a 1.0 M KOH solution or a mixed solution of 1.0 M KOH and 1.0 M EG at a potential range between -0.6 ~ 0.3 V with a

scan rate of  $50 \text{ mV s}^{-1}$ . Chronoamperometry (CA) was performed in a mixed solution of  $1.0 \text{ M KOH}$  and  $1.0 \text{ M EG}$  at  $-0.05 \text{ V}$  for  $3600 \text{ s}$ . CO stripping voltammetry was measured in a  $1.0 \text{ M KOH}$  solution at  $20 \text{ mV s}^{-1}$ . CO was bubbled into the  $1.0 \text{ M KOH}$  solution for  $30 \text{ min}$  to form a CO monolayer adsorption onto the catalyst. Then, the excess CO in the electrolyte was removed by bubbling  $\text{N}_2$  into the solution for  $15 \text{ min}$ .

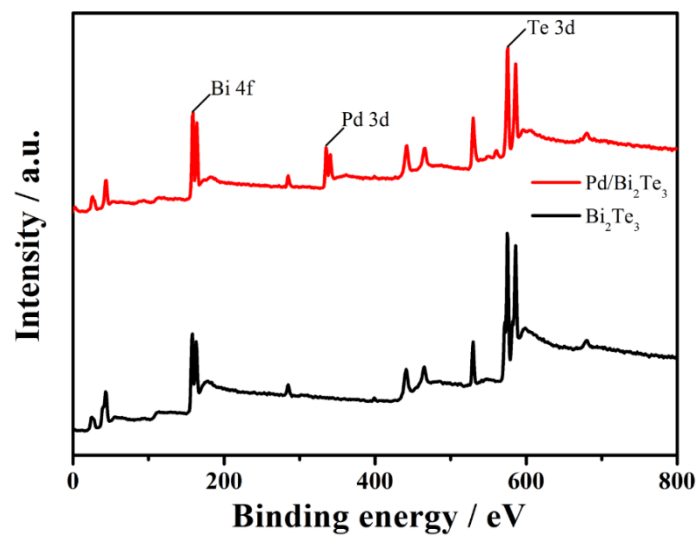

**Fig. S1** XPS survey spectra of  $\text{Bi}_2\text{Te}_3$  and  $\text{Pd}/\text{Bi}_2\text{Te}_3$ .

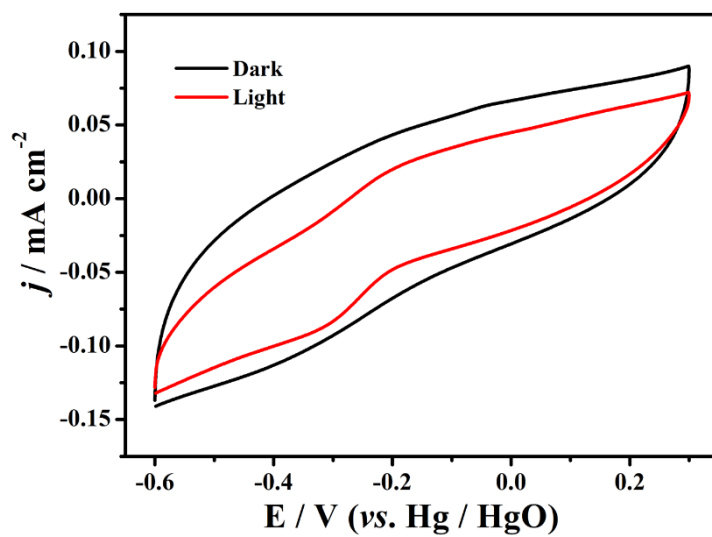

**Fig. S2** CV curves of  $\text{Bi}_2\text{Te}_3$  in 1.0 M EG + 1.0 M KOH solution under dark and visible light irradiation conditions at  $50 \text{ mV s}^{-1}$ .

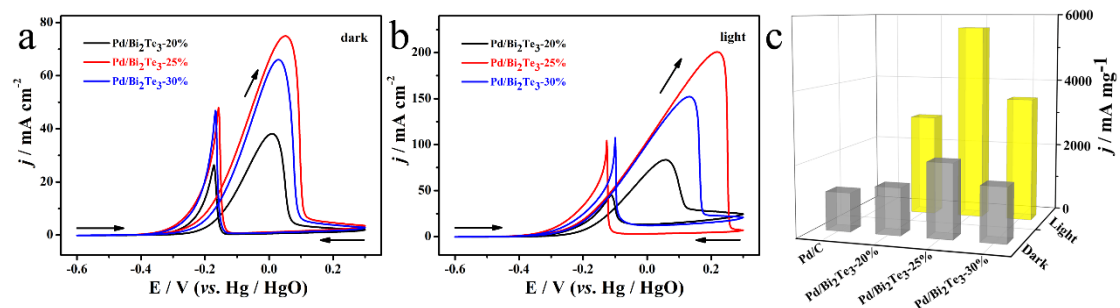

**Fig. S3** CV curves of Pd/Bi<sub>2</sub>Te<sub>3</sub> with different loading of Pd for EG oxidation under dark (a) and visible light irradiation (b) conditions. Mass activity of Pd/C and Pd/Bi<sub>2</sub>Te<sub>3</sub> with different loading of Pd in 1.0 M EG + 1.0 M KOH solution at 50 mV s<sup>-1</sup> (c).

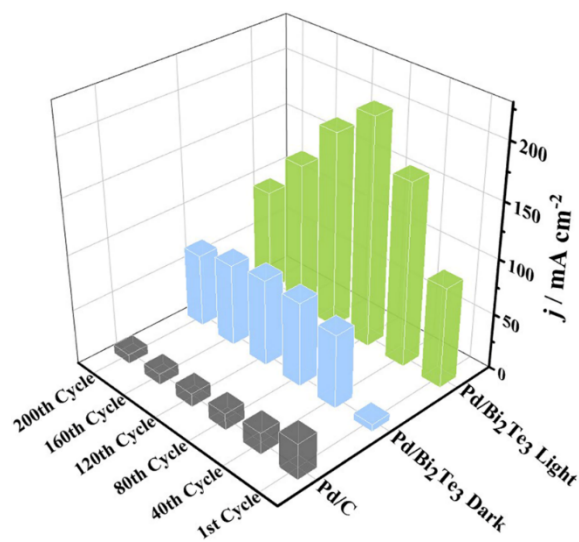

**Fig. S4** The histogram of forward peak current density of Pd/C and Pd/Bi<sub>2</sub>Te<sub>3</sub> vs. scanning cycles.

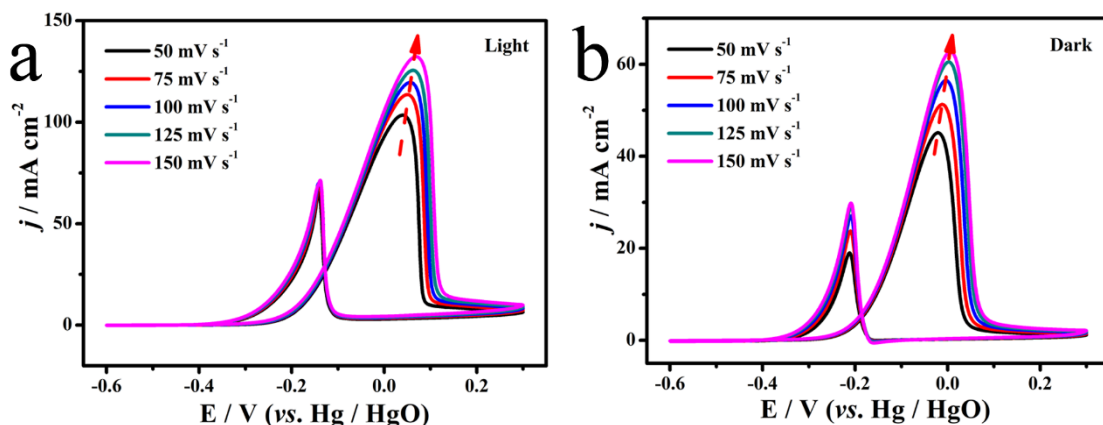

**Fig. S5** CV curves of Pd/Bi<sub>2</sub>Te<sub>3</sub> with (a) and without (b) visible light irradiation in 1.0 M EG + 1.0 M KOH solution at different scan rate.

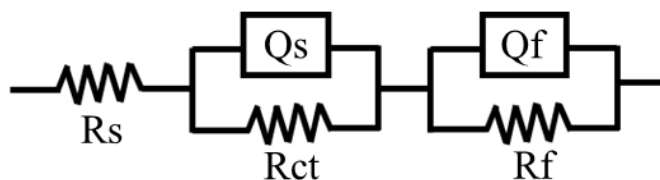

**Fig. S6** Equivalent circuit for EIS analysis. For the equivalent circuit,  $R_s$  is the uncompensated solution resistance,  $R_{ct}$  represents the charge-transfer resistance arising from alcohol oxidation and  $R_f$  stands for the film resistance.  $Q_s$  represents double-layer capacitance and  $Q_f$  corresponds to the film capacitance.

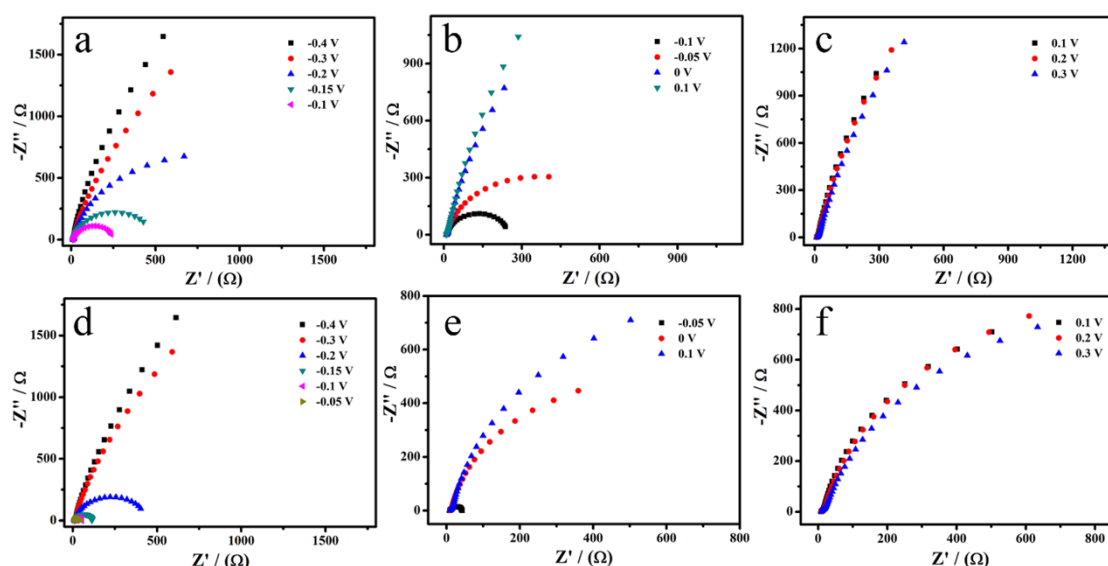

**Fig. S7** EIS spectra of Pd/Bi<sub>2</sub>Te<sub>3</sub> catalyst at different potentials in 1.0 M EG + 1.0 M KOH solution under dark (a-c) and visible light illumination (d-f) conditions.

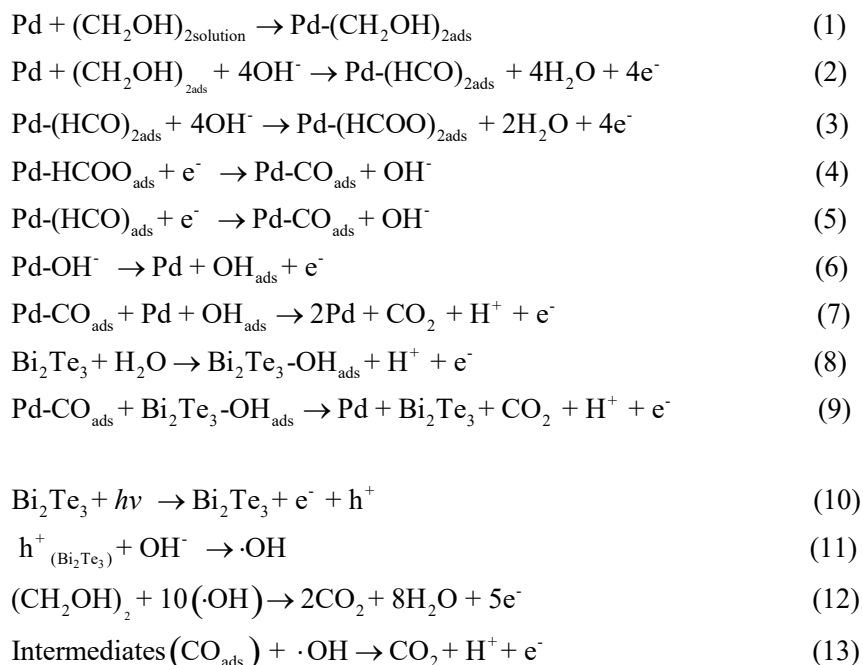

**Scheme S1** The photoelectrocatalytic process of EG oxidation over Pd/Bi<sub>2</sub>Te<sub>3</sub> catalyst.

**Table S1.** Binding energy (B.E.) of Te 3d and Bi 4f obtained from curve-fitted XPS spectra for Bi<sub>2</sub>Te<sub>3</sub> and Pd/Bi<sub>2</sub>Te<sub>3</sub> samples.

| Catalysts                          | Te 3d <sub>5/2</sub> |           | Te 3d <sub>3/2</sub> |           | Bi 4f <sub>7/2</sub>            |           | Bi 4f <sub>5/2</sub>            |           |
|------------------------------------|----------------------|-----------|----------------------|-----------|---------------------------------|-----------|---------------------------------|-----------|
|                                    | Peak                 | B.E. (eV) | Peak                 | B.E. (eV) | Peak                            | B.E. (eV) | Peak                            | B.E. (eV) |
| Bi <sub>2</sub> Te <sub>3</sub>    | Te <sup>2+</sup>     | 571.6     | Te <sup>2+</sup>     | 582.0     | Bi <sub>2</sub> Te <sub>3</sub> | 157.0     | Bi <sub>2</sub> Te <sub>3</sub> | 162.3     |
|                                    | Te <sup>4+</sup>     | 575.5     | Te <sup>4+</sup>     | 585.9     | Bismuth oxide                   | 158.5     | Bismuth oxide                   | 163.8     |
| Pd/Bi <sub>2</sub> Te <sub>3</sub> | Te <sup>2+</sup>     | 573.4     | Te <sup>2+</sup>     | 583.8     | Bi <sub>2</sub> Te <sub>3</sub> | 158.0     | Bi <sub>2</sub> Te <sub>3</sub> | 162.4     |
|                                    | Te <sup>4+</sup>     | 575.7     | Te <sup>4+</sup>     | 586.1     | Bismuth oxide                   | 158.7     | Bismuth oxide                   | 164.0     |



**Table S2.** Comparison with other Pd-based catalysts for EGOR.

| Catalysts                               | Electrolyte          | Mass activity [mA<br>mg <sub>Pd</sub> <sup>-1</sup> ] | Reference |
|-----------------------------------------|----------------------|-------------------------------------------------------|-----------|
| Pd-PPy/NGE                              | 1.0 M KOH + 1.0 M EG | 2176.7                                                | [1]       |
| Pd-Bi <sub>2</sub> Te <sub>3</sub> -1/C | 1.0 M KOH + 1.0 M EG | 2420.0                                                | [2]       |
| Pd-Cu <sub>2</sub> S                    | 1.0 M KOH + 1.0 M EG | 3254.0                                                | [3]       |
| PdPbAg NDs                              | 1.0 M KOH + 1.0 M EG | 3867.0                                                | [4]       |
| Pd/CoTe-C                               | 1.0 M KOH + 1.0 M EG | 3917.3                                                | [5]       |
| PdSn/rGO                                | 0.1 M KOH + 0.5 M EG | 4340.0                                                | [6]       |
| Pd/Bi <sub>2</sub> Te <sub>3</sub>      | 1.0 M KOH + 1.0 M EG | 5620.0                                                | This work |

## References

- [1] S. Xie, L. Deng, H. Huang, J. Yuan, J. Xu, R. Yue, *J. Colloid Interface Sci.* 2022, 608, 3130-3140.
- [2] H. Xu, B. Huang, Y. Zhao, G. He and H. Chen, *Inorg. Chem.*, 2022, **61**, 4533-4540.
- [3] H. Gao, C. Zhai, C. Yuan, Z. Liu, M. Zhu, *Electrochim. Acta*, 2020, **330**, 135214.
- [4] X. Lao, X. Zhang, T. Sun, A. Fu, Y. Zhang, Z. Li, L. Yang, C. Chen, X. Liao, J. Wang, W. Ye, P. Guo, *Chem. Mater.* 2024, **36**, 2124-2137.
- [5] F. Ren, Z. Zhang, Z. Liang, Y. Shen, X. Wang, Q. Chen, Y. Du, *J. Colloid Interface Sci.*, 2022, **616**, 316-325.
- [6] S. Mondal, V.S.K. Choutipalli, B.K. Jena, V. Subramanian, C.R. Raj, *J. Phys.Chem.C* 2020, **124**, 9631-9643.
